# Supplementary material for: Human adipose mesenchymal stem cell-derived exosomal-miRNAs are critical factors for inducing anti-proliferation signalling to A2780 and SKOV-3 ovarian cancer cells
Source: PubMed Central journal article supplement (PMC5143979; doi:10.1038/srep38498), 2016-12-08
Supplement: srep38498-s1.pdf [file srep38498-s1.pdf]

## Supplementary Data

### **Human adipose mesenchymal stem cell-derived exosomal-miRNAs are critical factors for inducing anti-proliferation signalling to A2780 and SKOV-3 ovarian cancer cells**

Abu Musa Md Talimur Reza, Yun-Jung Choi, Hideyo Yasuda & Jin-Hoi Kim\*

Department of Stem Cell and Regenerative Biology, Humanized Pig Research Centre (SRC), Konkuk University, Seoul 143-701, Republic of Korea

\* **Corresponding author:** Department of Stem Cell and Regenerative Biology, Humanized Pig Research Center (SRC), Konkuk University, Seoul 143-701, Republic of Korea.

*E-mail address:* jhkim541@konkuk.ac.kr

**Running title:** Exosomal-miRNAs intervention in ovarian cancer cells

**Supplementary Table S1:** Summary (with details) of miRNA expression detected in exosomes derived from hAMSC-CM.

| Mature miRNA     | Family Name  | Sequence                | Read Counts        |          |          |
|------------------|--------------|-------------------------|--------------------|----------|----------|
|                  |              |                         | Sample 1           | Sample 2 | Sample 3 |
| hsa-miR-4792     | hsa-miR-4792 | cggugagcgcucgcugggc     | 361010             | 381745   | 381918   |
| hsa-miR-320a     | hsa-miR-320  | aaaagcuggguugagggcga    | 1645               | 1311     | 1293     |
| hsa-miR-320b     |              | aaaagcuggguugagggcaa    | 2628               | 2094     | 2046     |
| hsa-miR-320c     |              | aaaagcuggguugaggggu     | 19                 | 16       | 26       |
| hsa-miR-26a-5p   | hsa-miR-26   | uucaguaauccaggauagcgu   | 146                | 110      | 74       |
| hsa-miR-378a-3p  | hsa-miR-378  | acuggacuuggagucagaagg   | 93                 | 113      | 96       |
| hsa-miR-7704     | hsa-miR-7704 | cgggucggcggcgacgug      | 1470               | 971      | 1145     |
| hsa-miR-181a-5p  | hsa-miR-181  | aacauucaacgcugcggugagu  | 226                | 224      | 130      |
| hsa-miR-181b-5p  |              | aacauucauugcugcgguggu   | 28                 | 26       | 8        |
| hsa-miR-181c-5p  |              | aacauucaaccugcggugagu   | 5                  | 1        | 1        |
| hsa-miR-127-3p   | hsa-miR-127  | ucggauccgucagcugugcgu   | 943                | 836      | 807      |
| hsa-miR-4466     | hsa-miR-4466 | gggugcggcggcggcggg      | 459                | 541      | 618      |
| hsa-miR-423-3p   | hsa-miR-423  | agcucgucugagccuccagau   | 195                | 143      | 155      |
| hsa-miR-423-5p   |              | ugagggcagagagcagacuuu   | 328                | 273      | 273      |
| hsa-miR-1246     | hsa-miR-1246 | aauggauuuuuggagcagg     | 122                | 104      | 128      |
| hsa-miR-22-3p    | hsa-miR-22   | aaagcuccaguuagaagcugu   | 772                | 638      | 671      |
| hsa-miR-7641     | hsa-miR-7641 | uugaucucggaagcuaagc     | 518                | 490      | 428      |
| hsa-miR-3960     | hsa-miR-3960 | ggcggcggcggagcggggg     | 134                | 105      | 148      |
| hsa-let-7a-5p    | hsa-let-7    | ugagguauguuguaauaguu    | 33                 | 33       | 9        |
| hsa-let-7b-5p    |              | ugagguauguuguguguu      | 5                  | 2        | 4        |
| hsa-let-7c-5p    |              | ugagguauguuguauguu      | 12                 | 9        | 10       |
| hsa-let-7d-5p    |              | agagguauguugcauaguu     | 3                  | 1        | 2        |
| hsa-let-7e-5p    |              | ugagguaugguuguaauaguu   | 4                  | 1        | 2        |
| hsa-let-7f-5p    |              | ugagguauguuguaauaguu    | 32                 | 18       | 16       |
| hsa-let-7g-5p    |              | ugagguauguuguaacaguu    | 3                  | 5        | 1        |
| hsa-let-7i-5p    |              | ugagguauguugugcuguu     | 9                  | 6        | 3        |
| hsa-miR-6087     |              | hsa-miR-6087            | ugagggggggggcggagc | 783      | 831      |
| hsa-miR-1273a    | hsa-miR-1273 | gggccaagcaagacucuuucuu  | 16                 | 4        | 4        |
| hsa-miR-1273d    |              | gaaccuagagguagcggcagau  | 23                 | 13       | 5        |
| hsa-miR-1273e    |              | uugcuuagaccaggaagugga   | 1                  | 8        | 7        |
| hsa-miR-1273f    |              | ggagauaggagguagcagug    | 17                 | 39       | 31       |
| hsa-miR-1273g-3p |              | accacugcaccagccugag     | 52                 | 83       | 87       |
| hsa-miR-4448     | hsa-miR-4448 | ggcuccuugucuaagggua     | 232                | 144      | 137      |
| hsa-miR-486-5p   | hsa-miR-486  | uccuauacugagcggcccgag   | 581                | 529      | 453      |
| hsa-miR-129-2-3p | hsa-miR-129  | aagccuuaccccaaaagcau    | 2                  | 2        | 2        |
| hsa-miR-129-5p   |              | cuuuuugcggugcggcuugc    | 6                  | 2        | 6        |
| hsa-miR-4532     | hsa-miR-4532 | ccccgggggcccggcg        | 449                | 449      | 625      |
| hsa-miR-619-5p   | hsa-miR-619  | gcuaggauacagcgaugacc    | 74                 | 61       | 83       |
| hsa-miR-136-3p   | hsa-miR-136  | caucaucgucuaaauagucuu   | 6                  | 9        | 4        |
| hsa-miR-136-5p   |              | acuccauuuuuugaugaugga   | 3                  | 3        | 3        |
| hsa-miR-151a-3p  | hsa-miR-151  | cuagacuagaagcuccuugaag  | 12                 | 14       | 17       |
| hsa-miR-151a-5p  |              | ucgaggagcucacagucuaau   | 3                  | 4        | 3        |
| hsa-miR-151b     |              | ucgaggagcucacagucuu     | 3                  | 4        | 3        |
| hsa-miR-204-3p   | hsa-miR-204  | gcuaggagcaaggaggacgu    | 1                  | 7        | 6        |
| hsa-miR-204-5p   |              | uuccuuuugcauccuauagccu  | 10                 | 8        | 1        |
| hsa-miR-21-3p    | hsa-miR-21   | caacaccagucgaugggcugu   | 6                  | 9        | 5        |
| hsa-miR-21-5p    |              | uagcuuaucaagacugauguuga | 23                 | 17       | 16       |
| hsa-miR-29a-3p   | hsa-miR-29   | uagcaccuucgaaucgguaa    | 7                  | 10       | 1        |
| hsa-miR-29b-3p   |              | uagcaccuuuugaauacaguuu  | 2                  | 2        | 2        |
| hsa-miR-29c-3p   |              | uagcaccuuuugaauacgguaa  | 1                  | 1        | 2        |
| hsa-miR-30a-5p   | hsa-miR-30   | uguaaacaaccucgacuggaag  | 78                 | 58       | 48       |
| hsa-miR-30c-5p   |              | uguaaacaaccuacucucag    | 6                  | 10       | 4        |
| hsa-miR-30d-5p   |              | uguaaacaaccgacuggaag    | 36                 | 21       | 23       |
| hsa-miR-30e-5p   |              | uguaaacaaccuagacuggaag  | 34                 | 18       | 16       |
| hsa-miR-378c     |              | acuggacuuggagucagaagugg | 11                 | 15       | 14       |
| hsa-miR-409-3p   | hsa-miR-409  | gaauuugcucgguaaccuccu   | 10                 | 3        | 12       |
| hsa-miR-409-5p   |              | agguaaccggagcaacuuugcau | 1                  | 4        | 2        |
| hsa-miR-663a     | hsa-miR-663  | aggcggggcggcgggaccgc    | 43                 | 22       | 26       |
| hsa-miR-663b     |              | gguggccggcggcggcggg     | 1                  | 5        | 1        |
| hsa-miR-92a-3p   | hsa-miR-92   | uaauagcucuuuccggccuugu  | 42                 | 34       | 38       |

|                   |              |                           |     |    |    |
|-------------------|--------------|---------------------------|-----|----|----|
| hsa-miR-92b-3p    |              | uauugcacucgucceggccucc    | 11  | 16 | 8  |
| hsa-miR-99a-5p    | hsa-miR-99   | aaccgguagauccgauuuugug    | 4   | 6  | 4  |
| hsa-miR-99b-5p    |              | caccgguagaaccgacuuugcg    | 31  | 36 | 30 |
| hsa-miR-10a-5p    | hsa-miR-10   | uaccuguaagauccgaaauugug   | 11  | 4  | 2  |
| hsa-miR-10b-5p    |              | uaccuguaagauccgaaauugug   | 16  | 3  | 5  |
| hsa-miR-125a-5p   | hsa-miR-125  | ucccugagaccuuuaccuuguga   | 12  | 22 | 12 |
| hsa-miR-125b-1-3p |              | acggguuaggcucuuugggagcu   | 3   | 1  | 3  |
| hsa-miR-125b-5p   |              | ucccugagaccuuuaccuuguga   | 43  | 31 | 18 |
| hsa-miR-126-3p    | hsa-miR-126  | ucguaccgugaguuuuuagcg     | 2   | 1  | 1  |
| hsa-miR-126-5p    |              | cauuuuuacuuuugguacgcg     | 6   | 5  | 7  |
| hsa-miR-100-5p    | hsa-miR-100  | aaccgguagauccgaaauugug    | 23  | 34 | 9  |
| hsa-miR-101-3p    | hsa-miR-101  | uacaguacugugauaacugaa     | 12  | 12 | 6  |
| hsa-miR-103a-3p   | hsa-miR-103  | agcagcauuugacagggcuuga    | 20  | 8  | 12 |
| hsa-miR-107       | hsa-miR-107  | agcagcauuugacagggcuauca   | 3   | 1  | 4  |
| hsa-miR-124-3p    | hsa-miR-124  | uaaggcacgcgguuagugcc      | 42  | 21 | 24 |
| hsa-miR-1254      | hsa-miR-1254 | agccuggaagcuggagccugcagu  | 2   | 4  | 2  |
| hsa-miR-128-3p    | hsa-miR-128  | ucacagugaaccgucucuuu      | 24  | 21 | 14 |
| hsa-miR-1285-5p   | hsa-miR-1285 | gauucacuuuuugucccagg      | 10  | 6  | 10 |
| hsa-miR-1290      | hsa-miR-1290 | uggauuuuuuggaucaggg       | 33  | 30 | 29 |
| hsa-miR-1291      | hsa-miR-1291 | uggccugagucgaaagaccagcagu | 13  | 15 | 20 |
| hsa-miR-1303      | hsa-miR-1303 | uuuagagacgggucuuugcu      | 11  | 6  | 3  |
| hsa-miR-1307-5p   | hsa-miR-1307 | ucgaccggaccugaccggcu      | 1   | 5  | 2  |
| hsa-miR-134-5p    | hsa-miR-134  | ugugacuguuuagaccagggg     | 2   | 1  | 5  |
| hsa-miR-138-5p    | hsa-miR-138  | agcuugguugugaauacagggcg   | 26  | 37 | 24 |
| hsa-miR-139-5p    | hsa-miR-139  | ucuaagugcacgugucucagu     | 2   | 4  | 1  |
| hsa-miR-140-3p    | hsa-miR-140  | uaccacaggguaagaccacgg     | 13  | 4  | 6  |
| hsa-miR-143-3p    | hsa-miR-143  | ugagauaagcacugaugcuc      | 29  | 32 | 34 |
| hsa-miR-144-3p    | hsa-miR-144  | uacaguuuagauuagugacu      | 1   | 1  | 3  |
| hsa-miR-1468-5p   | hsa-miR-1468 | cuccguuugcuguuucgug       | 1   | 3  | 3  |
| hsa-miR-148a-3p   | hsa-miR-148  | ucagugcauacagaacuuugu     | 6   | 6  | 3  |
| hsa-miR-153-3p    | hsa-miR-153  | uugcauagucacaaagugauc     | 6   | 6  | 6  |
| hsa-miR-16-5p     | hsa-miR-16   | uagcagcacguuuuuuugggcg    | 16  | 22 | 10 |
| hsa-miR-186-5p    | hsa-miR-186  | caaagaaucuccuuuugggcu     | 30  | 18 | 31 |
| hsa-miR-1908-3p   | hsa-miR-1908 | ccggccgccggcuccgccccg     | 6   | 6  | 10 |
| hsa-miR-191-5p    | hsa-miR-191  | caaccgaaucacaaagcagcug    | 63  | 68 | 55 |
| hsa-miR-192-5p    | hsa-miR-192  | cugaccuuuagaaugacagcc     | 3   | 2  | 4  |
| hsa-miR-193a-5p   | hsa-miR-193  | ugggucuuuugcggcgagaua     | 2   | 2  | 2  |
| hsa-miR-1972      | hsa-miR-1972 | ucaggccagggcacaguggcuca   | 34  | 30 | 24 |
| hsa-miR-199a-5p   | hsa-miR-199  | cccauguuuagacuuuuguc      | 1   | 1  | 1  |
| hsa-miR-205-5p    | hsa-miR-205  | uccuucuuuaccagcgagucug    | 1   | 4  | 4  |
| hsa-miR-212-5p    | hsa-miR-212  | accuuggcucuaagacugcuacu   | 2   | 1  | 2  |
| hsa-miR-218-5p    | hsa-miR-218  | uuugcuugauuaccaugu        | 8   | 4  | 2  |
| hsa-miR-221-3p    | hsa-miR-221  | agcuacauugucuggguuuc      | 12  | 3  | 2  |
| hsa-miR-222-3p    | hsa-miR-222  | agcuacauugucuggguuuc      | 3   | 4  | 6  |
| hsa-miR-23b-3p    | hsa-miR-23   | aucacauugcagggauuacc      | 1   | 3  | 1  |
| hsa-miR-25-3p     | hsa-miR-25   | cauugcucuugucugcugc       | 2   | 1  | 3  |
| hsa-miR-27b-3p    | hsa-miR-27   | uuacacagugcuuagucugc      | 33  | 26 | 21 |
| hsa-miR-28-3p     | hsa-miR-28   | cacuaguuugagcucugga       | 17  | 10 | 16 |
| hsa-miR-299-3p    | hsa-miR-299  | uauugggauuguaaacggcuu     | 15  | 3  | 6  |
| hsa-miR-338-3p    | hsa-miR-338  | uccagcaucaguuuuuugug      | 6   | 8  | 5  |
| hsa-miR-339-5p    | hsa-miR-339  | ucccuugcuccagggacucacg    | 1   | 1  | 1  |
| hsa-miR-3614-5p   | hsa-miR-3614 | ccacuuggaucuuuagggcugccc  | 1   | 1  | 3  |
| hsa-miR-3615      | hsa-miR-3615 | ucucucggcuccucggcguc      | 6   | 5  | 1  |
| hsa-miR-3648      | hsa-miR-3648 | agccgggggucgcccagg        | 36  | 30 | 42 |
| hsa-miR-3653-3p   | hsa-miR-3653 | ccuccugauuuuuuuuuc        | 1   | 1  | 1  |
| hsa-miR-3687      | hsa-miR-3687 | cccggacagcguucgucgacgu    | 104 | 70 | 84 |
| hsa-miR-370-3p    | hsa-miR-370  | gccugcugggguggaaccuggu    | 23  | 21 | 31 |
| hsa-miR-375       | hsa-miR-375  | uuuguucguucgucgugga       | 1   | 1  | 3  |
| hsa-miR-424-3p    | hsa-miR-424  | caaaacgugagggcgucguau     | 28  | 42 | 22 |
| hsa-miR-4449      | hsa-miR-4449 | cgucgggggucgucgagga       | 11  | 7  | 4  |
| hsa-miR-4454      | hsa-miR-4454 | ggauccgagucagggaccca      | 27  | 20 | 32 |
| hsa-miR-4461      | hsa-miR-4461 | gauugagacuaaguuuugcuaag   | 1   | 1  | 1  |
| hsa-miR-4488      | hsa-miR-4488 | agggggcgggucggcg          | 20  | 10 | 22 |
| hsa-miR-4492      | hsa-miR-4492 | ggggcugggcgcgcc           | 2   | 4  | 2  |
| hsa-miR-4508      | hsa-miR-4508 | gcggggcugggcgcg           | 7   | 7  | 14 |
| hsa-miR-4516      | hsa-miR-4516 | gggagaaggucggggc          | 32  | 30 | 20 |

|                 |              |                          |    |    |    |
|-----------------|--------------|--------------------------|----|----|----|
| hsa-miR-4787-5p | hsa-miR-4787 | gcggggugggcgcggaucucc    | 14 | 8  | 17 |
| hsa-miR-484     | hsa-miR-484  | ucaggcucagucccuccgau     | 3  | 3  | 2  |
| hsa-miR-5095    | hsa-miR-5095 | uuacaggcgugaaccaccgcg    | 1  | 1  | 6  |
| hsa-miR-5096    | hsa-miR-5096 | guuucaccauguuggucaggc    | 44 | 57 | 41 |
| hsa-miR-5191    | hsa-miR-5191 | aggauaggaagaugaagugcu    | 4  | 3  | 2  |
| hsa-miR-5585-3p | hsa-miR-5585 | cugauuagcugggacuacaggu   | 14 | 15 | 19 |
| hsa-miR-615-3p  | hsa-miR-615  | uccgagccugggucucccuu     | 34 | 15 | 18 |
| hsa-miR-3195    | hsa-miR-3195 | cgcgccggcggcggguu        | 36 | 26 | 46 |
| hsa-miR-381-3p  | hsa-miR-381  | uauacaagggcaagcucucugu   | 5  | 4  | 5  |
| hsa-miR-410-3p  | hsa-miR-410  | aaauaaacacagauaggccugu   | 4  | 4  | 6  |
| hsa-miR-411-5p  | hsa-miR-411  | uaguagaccguauagcguacg    | 6  | 8  | 3  |
| hsa-miR-769-5p  | hsa-miR-769  | ugagaccucuggguucugagcu   | 4  | 10 | 4  |
| hsa-miR-8061    | hsa-miR-8061 | cuuagauuagggauuuuuuu     | 2  | 1  | 2  |
| hsa-miR-9-5p    | hsa-miR-9    | ucuuugguuauacuagcguauaga | 60 | 51 | 33 |
| hsa-miR-93-5p   | hsa-miR-93   | caaagugcugucgucgagguag   | 7  | 9  | 4  |

**Supplementary Table S2: KEGG partway ranking summary with detail information.**

| Term                                                   | Term ID | Total Genes | Union Target | miRNA in the Term | Score |
|--------------------------------------------------------|---------|-------------|--------------|-------------------|-------|
| Pathways in cancer                                     | 5200    | 325         | 241          | 88                | 2.286 |
| Axon guidance                                          | 4360    | 129         | 102          | 82                | 1.833 |
| Mapk signaling pathway                                 | 4010    | 272         | 187          | 88                | 1.817 |
| Focal adhesion                                         | 4510    | 199         | 149          | 86                | 1.791 |
| Neurotrophin signaling pathway                         | 4722    | 127         | 96           | 83                | 1.579 |
| Regulation of actin cytoskeleton                       | 4810    | 213         | 147          | 83                | 1.374 |
| Olfactory transduction                                 | 4740    | 388         | 20           | 52                | 1.373 |
| Glioma                                                 | 5214    | 65          | 50           | 80                | 1.334 |
| Prostate cancer                                        | 5215    | 89          | 67           | 81                | 1.271 |
| Endocytosis                                            | 4144    | 201         | 142          | 80                | 1.265 |
| Small cell lung cancer                                 | 5222    | 84          | 66           | 81                | 1.26  |
| Wnt signaling pathway                                  | 4310    | 150         | 115          | 81                | 1.257 |
| Melanoma                                               | 5218    | 71          | 52           | 81                | 1.252 |
| Tgf-beta signaling pathway                             | 4350    | 84          | 64           | 75                | 1.226 |
| Chronic myeloid leukemia                               | 5220    | 73          | 58           | 77                | 1.188 |
| Pancreatic cancer                                      | 5212    | 70          | 59           | 77                | 1.161 |
| Ubiquitin mediated proteolysis                         | 4120    | 135         | 89           | 80                | 1.118 |
| ErbB signaling pathway                                 | 4012    | 87          | 68           | 79                | 1.105 |
| Dilated cardiomyopathy                                 | 5414    | 90          | 58           | 77                | 1.077 |
| Long-term potentiation                                 | 4720    | 70          | 51           | 67                | 1.066 |
| Oocyte meiosis                                         | 4114    | 112         | 73           | 79                | 1.062 |
| Insulin signaling pathway                              | 4910    | 137         | 95           | 81                | 1.06  |
| Hypertrophic cardiomyopathy (HCM)                      | 5410    | 87          | 56           | 76                | 1.056 |
| T cell receptor signaling pathway                      | 4660    | 108         | 78           | 78                | 1.022 |
| Adherens junction                                      | 4520    | 73          | 59           | 82                | 0.997 |
| Ecm-receptor interaction                               | 4512    | 84          | 56           | 71                | 0.989 |
| Renal cell carcinoma                                   | 5211    | 70          | 58           | 80                | 0.973 |
| Arrhythmogenic right ventricular cardiomyopathy (ARVC) | 5412    | 74          | 53           | 73                | 0.922 |
| Mtor signaling pathway                                 | 4150    | 52          | 40           | 78                | 0.906 |
| Cell cycle                                             | 4110    | 124         | 75           | 80                | 0.903 |
| Calcium signaling pathway                              | 4020    | 177         | 98           | 77                | 0.899 |
| Non-small cell lung cancer                             | 5223    | 54          | 41           | 77                | 0.88  |
| Melanogenesis                                          | 4916    | 101         | 62           | 76                | 0.872 |
| P53 signaling pathway                                  | 4115    | 68          | 46           | 72                | 0.862 |
| Fc gamma r-mediated phagocytosis                       | 4666    | 94          | 64           | 75                | 0.851 |
| Progesterone-mediated oocyte maturation                | 4914    | 86          | 52           | 77                | 0.846 |
| Adipocytokine signaling pathway                        | 4920    | 68          | 50           | 72                | 0.807 |
| Protein processing in endoplasmic reticulum            | 4141    | 166         | 108          | 75                | 0.801 |
| Amoebiasis                                             | 5146    | 105         | 64           | 71                | 0.791 |

|                                                            |      |     |     |    |       |
|------------------------------------------------------------|------|-----|-----|----|-------|
| Chagas_disease                                             | 5142 | 104 | 67  | 75 | 0.784 |
| Colorectal_cancer                                          | 5210 | 62  | 49  | 72 | 0.78  |
| Tight_junction                                             | 4530 | 132 | 81  | 81 | 0.776 |
| Bacterial_invasion_of_epithelial_cells                     | 5100 | 70  | 55  | 74 | 0.773 |
| Bladder_cancer                                             | 5219 | 42  | 34  | 73 | 0.767 |
| Gnrh_signaling_pathway                                     | 4912 | 101 | 61  | 76 | 0.764 |
| Cytokine-cytokine_receptor_interaction                     | 4060 | 275 | 132 | 79 | 0.762 |
| Chemokine_signaling_pathway                                | 4062 | 189 | 111 | 82 | 0.745 |
| Amyotrophic_lateral_sclerosis_(ALS)                        | 5014 | 54  | 39  | 70 | 0.734 |
| Jak-stat_signaling_pathway                                 | 4630 | 155 | 88  | 78 | 0.731 |
| Acute_myeloid_leukemia                                     | 5221 | 57  | 44  | 75 | 0.717 |
| Vegf_signaling_pathway                                     | 4370 | 76  | 47  | 78 | 0.713 |
| Gap_junction                                               | 4540 | 90  | 55  | 74 | 0.701 |
| Type_ii_diabetes_mellitus                                  | 4930 | 47  | 30  | 67 | 0.672 |
| Protein_digestion_and_absorption                           | 4974 | 80  | 42  | 64 | 0.67  |
| Long-term_depression                                       | 4730 | 70  | 42  | 72 | 0.662 |
| Aldosterone-regulated_sodium_reabsorption                  | 4960 | 42  | 28  | 67 | 0.658 |
| Pancreatic_secretion                                       | 4972 | 103 | 48  | 78 | 0.653 |
| Gastric_acid_secretion                                     | 4971 | 74  | 46  | 72 | 0.642 |
| B_cell_receptor_signaling_pathway                          | 4662 | 75  | 45  | 74 | 0.637 |
| Toxoplasmosis                                              | 5145 | 132 | 76  | 77 | 0.634 |
| Shigellosis                                                | 5131 | 61  | 46  | 73 | 0.632 |
| Apoptosis                                                  | 4210 | 88  | 58  | 72 | 0.631 |
| Phosphatidylinositol_signaling_system                      | 4070 | 78  | 51  | 69 | 0.627 |
| Vascular_smooth_muscle_contraction                         | 4270 | 126 | 67  | 77 | 0.626 |
| Endometrial_cancer                                         | 5213 | 52  | 40  | 72 | 0.619 |
| Salivary_secretion                                         | 4970 | 89  | 47  | 74 | 0.609 |
| Fc_epsilon_ri_signaling_pathway                            | 4664 | 79  | 48  | 72 | 0.585 |
| Cell_adhesion_molecules_(CAMs)                             | 4514 | 133 | 69  | 81 | 0.585 |
| Leukocyte_transendothelial_migration                       | 4670 | 116 | 70  | 77 | 0.585 |
| Hepatitis_C                                                | 5160 | 134 | 75  | 75 | 0.543 |
| Neuroactive_ligand-receptor_interaction                    | 4080 | 318 | 119 | 78 | 0.54  |
| Notch_signaling_pathway                                    | 4330 | 47  | 33  | 68 | 0.523 |
| Lysosome                                                   | 4142 | 121 | 60  | 66 | 0.516 |
| Vasopressin-regulated_water_reabsorption                   | 4962 | 44  | 33  | 65 | 0.513 |
| Toll-like_receptor_signaling_pathway                       | 4620 | 102 | 60  | 71 | 0.512 |
| Thyroid_cancer                                             | 5216 | 29  | 22  | 60 | 0.511 |
| Viral_myocarditis                                          | 5416 | 70  | 34  | 68 | 0.505 |
| Basal_cell_carcinoma                                       | 5217 | 55  | 37  | 65 | 0.496 |
| Rna_transport                                              | 3013 | 144 | 76  | 75 | 0.494 |
| Epithelial_cell_signaling_in_helicobacter_pylori_infection | 5120 | 68  | 44  | 68 | 0.493 |
| Rna_degradation                                            | 3018 | 57  | 25  | 67 | 0.489 |
| Natural_killer_cell_mediated_cytotoxicity                  | 4650 | 140 | 55  | 73 | 0.457 |
| Purine_metabolism                                          | 230  | 161 | 67  | 70 | 0.452 |
| Glycosaminoglycan_biosynthesis_heparan_sulfate             | 534  | 26  | 19  | 50 | 0.443 |
| Huntington's_disease                                       | 5016 | 183 | 76  | 71 | 0.443 |
| Spliceosome                                                | 3040 | 127 | 60  | 71 | 0.442 |
| Phagosome                                                  | 4145 | 154 | 64  | 72 | 0.432 |
| Inositol_phosphate_metabolism                              | 562  | 57  | 33  | 61 | 0.431 |
| Alzheimer's_disease                                        | 5010 | 168 | 73  | 72 | 0.419 |
| Nod-like_receptor_signaling_pathway                        | 4621 | 62  | 31  | 57 | 0.41  |
| Glycerophospholipid_metabolism                             | 564  | 79  | 43  | 58 | 0.408 |
| Hedgehog_signaling_pathway                                 | 4340 | 56  | 37  | 61 | 0.401 |
| Snare_interactions_in_vesicular_transport                  | 4130 | 36  | 26  | 57 | 0.4   |
| Vibrio_cholerae_infection                                  | 5110 | 54  | 32  | 60 | 0.392 |
| Systemic_lupus_erythematosus                               | 5322 | 136 | 28  | 52 | 0.389 |
| Parkinson's_disease                                        | 5012 | 130 | 39  | 60 | 0.384 |
| Pathogenic_escherichia_coli_infection                      | 5130 | 56  | 31  | 60 | 0.378 |
| Rig-i-like_receptor_signaling_pathway                      | 4622 | 71  | 34  | 62 | 0.372 |

|                                                          |      |     |    |    |       |
|----------------------------------------------------------|------|-----|----|----|-------|
| Cardiac_muscle_contraction                               | 4260 | 77  | 33 | 65 | 0.363 |
| Prion_diseases                                           | 5020 | 36  | 21 | 59 | 0.352 |
| Oxidative_phosphorylation                                | 190  | 132 | 32 | 46 | 0.341 |
| Hematopoietic_cell_lineage                               | 4640 | 88  | 38 | 54 | 0.322 |
| O-glycan_biosynthesis                                    | 512  | 30  | 18 | 46 | 0.322 |
| Leishmaniasis                                            | 5140 | 72  | 33 | 58 | 0.321 |
| N-glycan_biosynthesis                                    | 510  | 49  | 25 | 56 | 0.32  |
| Lysine_degradation                                       | 310  | 44  | 25 | 58 | 0.317 |
| Carbohydrate_digestion_and_absorption                    | 4973 | 43  | 20 | 62 | 0.313 |
| Ppar_signaling_pathway                                   | 3320 | 70  | 31 | 57 | 0.308 |
| Pyrimidine_metabolism                                    | 240  | 99  | 36 | 49 | 0.289 |
| Basal_transcription_factors                              | 3022 | 35  | 19 | 45 | 0.289 |
| Glycosphingolipid_biosynthesis_lacto_and_neolacto_series | 601  | 26  | 14 | 47 | 0.287 |
| Peroxisome                                               | 4146 | 79  | 31 | 58 | 0.277 |
| Malaria                                                  | 5144 | 51  | 29 | 51 | 0.277 |
| Sphingolipid_metabolism                                  | 600  | 40  | 20 | 48 | 0.267 |
| Cysteine_and_methionine_metabolism                       | 270  | 36  | 18 | 50 | 0.253 |
| Glycerolipid_metabolism                                  | 561  | 49  | 22 | 46 | 0.249 |
| Abc_transporters                                         | 2010 | 44  | 22 | 49 | 0.248 |
| Complement_and_coagulation_cascades                      | 4610 | 69  | 16 | 52 | 0.242 |
| Type_i_diabetes_mellitus                                 | 4940 | 43  | 19 | 46 | 0.234 |
| Selenoamino_acid_metabolism                              | 450  | 26  | 13 | 52 | 0.229 |
| Graft-versus-host_disease                                | 5332 | 41  | 13 | 42 | 0.228 |
| Ether_lipid_metabolism                                   | 565  | 35  | 15 | 43 | 0.227 |
| Allograft_rejection                                      | 5330 | 37  | 14 | 39 | 0.223 |
| Intestinal_immune_network_for_iga_production             | 4672 | 48  | 20 | 41 | 0.214 |
| Alanine_aspartate_and_glutamate_metabolism               | 250  | 32  | 19 | 41 | 0.212 |
| Antigen_processing_and_presentation                      | 4612 | 76  | 22 | 42 | 0.21  |
| Arginine_and_proline_metabolism                          | 330  | 54  | 22 | 44 | 0.207 |
| Maturity_onset_diabetes_of_the_young                     | 4950 | 25  | 10 | 35 | 0.203 |
| Nucleotide_excision_repair                               | 3420 | 44  | 20 | 48 | 0.201 |
| Starch_and_sucrose_metabolism                            | 500  | 53  | 22 | 42 | 0.193 |
| Autoimmune_thyroid_disease                               | 5320 | 52  | 12 | 35 | 0.178 |
| Glutathione_metabolism                                   | 480  | 50  | 20 | 41 | 0.175 |
| Cytosolic_dna-sensing_pathway                            | 4623 | 56  | 16 | 34 | 0.17  |
| Glycolysis_gluconeogenesis                               | 10   | 65  | 19 | 35 | 0.169 |
| Regulation_of_autophagy                                  | 4140 | 34  | 12 | 41 | 0.167 |
| Amino_sugar_and_nucleotide_sugar_metabolism              | 520  | 47  | 17 | 37 | 0.163 |
| Citrate_cycle_(TCA_cycle)                                | 20   | 31  | 16 | 40 | 0.16  |
| Glycosylphosphatidylinositol(GPI)-anchor_biosynthesis    | 563  | 25  | 9  | 41 | 0.159 |
| Primary_immunodeficiency                                 | 5340 | 35  | 14 | 37 | 0.158 |
| Fatty_acid_metabolism                                    | 71   | 43  | 19 | 32 | 0.152 |
| Steroid_hormone_biosynthesis                             | 140  | 56  | 18 | 29 | 0.15  |
| Collecting_duct_acid_secretion                           | 4966 | 27  | 10 | 36 | 0.149 |
| Galactose_metabolism                                     | 52   | 26  | 13 | 39 | 0.148 |
| Retinol_metabolism                                       | 830  | 65  | 18 | 28 | 0.147 |
| Valine_leucine_and_ileucine_degradation                  | 280  | 44  | 16 | 33 | 0.144 |
| Metabolism_of_xenobiotics_by_cytochrome_p450             | 980  | 71  | 18 | 24 | 0.139 |
| Aminoacyl-trna_biosynthesis                              | 970  | 63  | 13 | 25 | 0.134 |
| Arachidonic_acid_metabolism                              | 590  | 57  | 9  | 32 | 0.128 |
| Fructose_and_mannose_metabolism                          | 51   | 34  | 15 | 33 | 0.126 |
| Drug_metabolism_cytochrome_p450                          | 982  | 73  | 18 | 22 | 0.125 |
| Base_excision_repair                                     | 3410 | 33  | 10 | 32 | 0.12  |
| Taste_transduction                                       | 4742 | 52  | 13 | 29 | 0.12  |
| Staphylococcus_aureus_infection                          | 5150 | 55  | 12 | 27 | 0.119 |
| Rna_polymerase                                           | 3020 | 29  | 9  | 27 | 0.119 |
| Proteasome                                               | 3050 | 44  | 13 | 28 | 0.114 |
| Glycine_serine_and_threonine_metabolism                  | 260  | 32  | 8  | 25 | 0.113 |
| Butanoate_metabolism                                     | 650  | 30  | 11 | 26 | 0.111 |

|                                          |      |    |    |    |       |
|------------------------------------------|------|----|----|----|-------|
| Pyruvate_metabolism                      | 620  | 41 | 12 | 28 | 0.108 |
| Tyrosine_metabolism                      | 350  | 41 | 8  | 24 | 0.099 |
| Tryptophan_metabolism                    | 380  | 42 | 14 | 25 | 0.098 |
| Asthma                                   | 5310 | 30 | 7  | 23 | 0.088 |
| Phototransduction                        | 4744 | 29 | 9  | 24 | 0.088 |
| Dna_replication                          | 3030 | 36 | 12 | 19 | 0.074 |
| Drug_metabolism_other_enzymes            | 983  | 52 | 14 | 12 | 0.074 |
| Histidine_metabolism                     | 340  | 29 | 8  | 15 | 0.071 |
| Linoleic_acid_metabolism                 | 591  | 29 | 4  | 14 | 0.066 |
| Porphyrin_and_chlorophyll_metabolism     | 860  | 43 | 15 | 11 | 0.064 |
| Propanoate_metabolism                    | 640  | 32 | 8  | 18 | 0.064 |
| Pentose_and_glucuronate_interconversions | 40   | 31 | 12 | 9  | 0.059 |
| Pentose_phosphate_pathway                | 30   | 26 | 7  | 14 | 0.053 |
| Ascorbate_and_aldarate_metabolism        | 53   | 26 | 11 | 6  | 0.052 |
| Homologous_recombination                 | 3440 | 28 | 8  | 9  | 0.041 |
| Ribosome                                 | 3010 | 90 | 2  | 5  | 0.022 |

**Supplementary Table S3: List of primer sets used for qRT-PCR**

| <b>A. Primers used to confirm miRNA expression</b>                            |                                 |                                                                                                |
|-------------------------------------------------------------------------------|---------------------------------|------------------------------------------------------------------------------------------------|
| <b>miRNA Name</b>                                                             | <b>miRNA specific 5' primer</b> | <b>mRQ 3' Primer</b>                                                                           |
| hsa-miR-4792                                                                  | 5'-CGGTAGCGCTCGCTGGC-3'         | Provided with Mir-X™ miRNA qRT-PCR SYBR® Kit (Clontech Laboratories, Inc., Takara Bio, CA, US) |
| hsa-miR-6087                                                                  | 5'-TGAGGCGGGGGGGCGAGC-3'        |                                                                                                |
| hsa-miR-320a                                                                  | 5'-AAAAGCTGGGTTGAGAGGGCGA-3'    |                                                                                                |
| hsa-miR-7704                                                                  | 5'-CGGGGTTCGGCGGCGACGTG-3'      |                                                                                                |
| hsa-miR-181a-5p                                                               | 5'-AACATTCAACGCTGTCCGGTGAGT-3'  |                                                                                                |
| hsa-let-7a-5p                                                                 | 5'-TGAGGTAGTAGGTTGTATAGTT-3'    |                                                                                                |
| hsa-miR-124-3p                                                                | 5'-TAAGGCACGCGGTGAATGCC-3'      |                                                                                                |
| hsa-miR-26a-5p                                                                | 5'-TTCAAGTAATCCAGGATAGGCT-3'    |                                                                                                |
| <b>B. Primers used to detect target molecule transcript (mRNA) expression</b> |                                 |                                                                                                |
| <b>Gene</b>                                                                   | <b>Forward Primer</b>           | <b>Reverse Primer</b>                                                                          |
| CDK2                                                                          | 5'-CACCGAGACCTTAAACCTCAG-3'     | 5'-TCAGAATCTCCAGGGAATAGGG-3'                                                                   |
| CDK4                                                                          | 5'-TTCCCATCAGCACAGTTCG-3'       | 5'-TCTACATGCTCAAACACCAGG-3'                                                                    |
| CDK6                                                                          | 5'-GTCTGATTACCTGCTCCGC-3'       | 5'-ACACGATTACATAGCCTCTGC-3'                                                                    |
| IGFR                                                                          | 5'-AGTTATCTCCGGTCTCTGAGG-3'     | 5'-TCTGTGGACGAACTTATTGGC-3'                                                                    |
| TGFBR1                                                                        | 5'-GCCAAATATCCCAAACAGATGG-3'    | 5'-ATGCCTTCCTGTTGACTGAG-3'                                                                     |
| AR                                                                            | 5'-AATCCCACATCCTGCTCAAG-3'      | 5'-AAGTCCACGCTCACCATG-3'                                                                       |
| ITGB1                                                                         | 5'-TGTAAGGAGAAGGATGTTGACG-3'    | 5'-CAACCACACCAGCTACAATTG-3'                                                                    |
| ITGB3                                                                         | 5'-CAAGTGTGAATGTGGCAGC-3'       | 5'-TTTTCGTCATGTAGGGCTCC-3'                                                                     |
| AKT3                                                                          | 5'-AGACCGTTTGTGTTTTGTGATG-3'    | 5'-GAATGTAGATAGTCCAAGGCAGAG-3'                                                                 |
| PIK3R3                                                                        | 5'-GAAAGTCGAGATGGAGAGCAG-3'     | 5'-AGTTCTGTGCGAATAGGGCATC-3'                                                                   |
| NRAS                                                                          | 5'-AATACATGAGGACAGGCGAAG-3'     | 5'-GTTTCCCCTAGCACCATAGG-3'                                                                     |
| KRAS                                                                          | 5'-GAGGGAGATCCGACAATACAG-3'     | 5'-TCTCGAACTAATGTATAGAAGGCATC-3'                                                               |
| MAPK1                                                                         | 5'-AGATCTGTGACTTTGGCCTG-3'      | 5'-TCAATGGACTTGGTGTAGCC-3'                                                                     |
| STAT3                                                                         | 5'-TTCTGGGCACAAACACAAAAG-3'     | 5'-TCAGTCACAATCAGGGAAGC-3'                                                                     |
| GAPDH                                                                         | 5'-CTTTTAACTCTGGTAAAGTGG-3'     | 5'-TTTTGGCTCCCCCTGCAAAT-3'                                                                     |

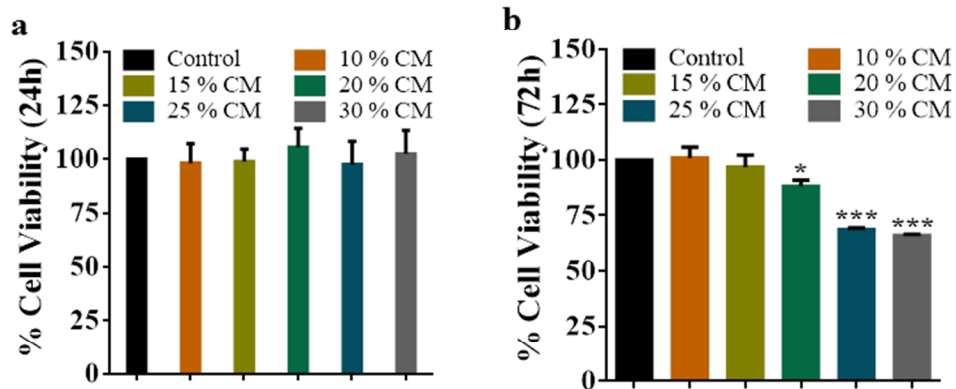

**Supplementary Figure S1. Selection of hAMSC-CM dosage.** **a**, % viability of A2780 cancer cells remained unchanged at 24 h of treatment with hAMSC-CM compared to control. **b**, at 72 h, cell viability started to decline upon 20 % CM incorporation; and optimum effect of CM was detected at 25% CM supplementation. The experiments have been repeated at least three times. \* $p < 0.05$ , \*\* $p < 0.01$  and \*\*\* $p < 0.001$ .



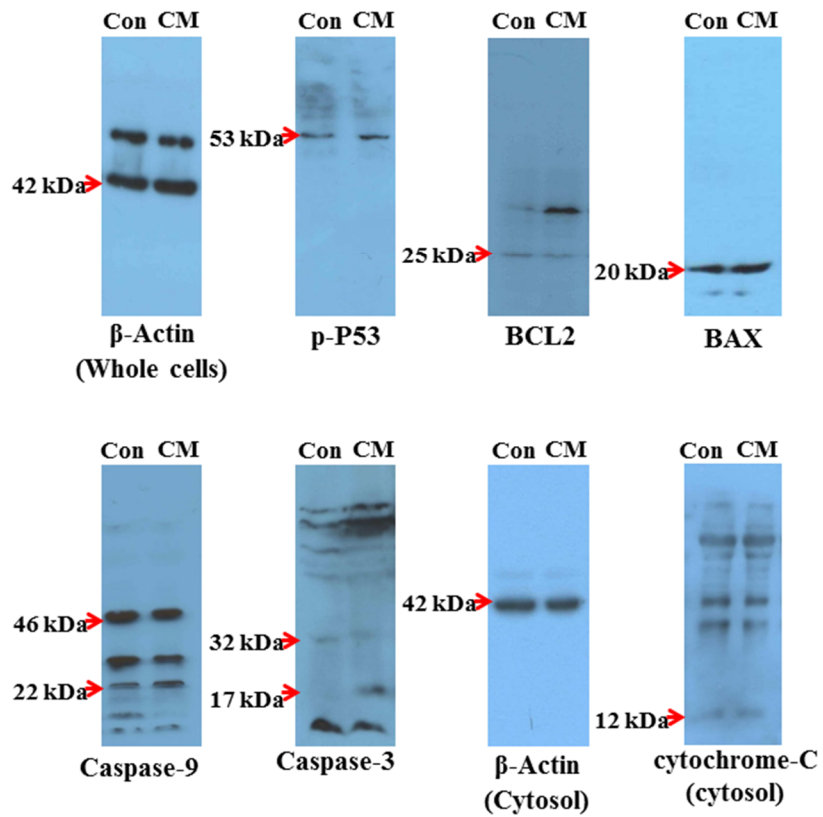

**Supplementary Figure S2. Full length gel images of Figure-1f.** The figure is showing the full length gel images of western-blot data presented in Figure-1f. The images are representative of three independent experiments.

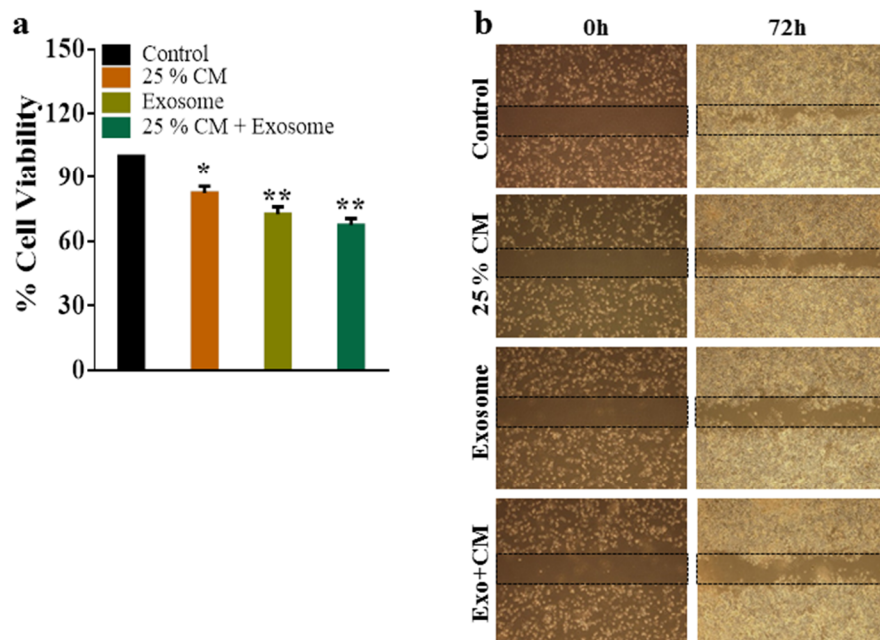

**Supplementary Figure S3. Cell viability and wound healing assay using CM, exosomes or both CM and exosomes. a,** % viability of A2780 cells at 72 h of treatment; internalization of exosomes reduced cell viability more efficiently than CM alone. **b,** exosomes internalization could restrain wound healing capacity of A2780 cells more effectively than CM alone. The experiments have been repeated at least three times. \* $p < 0.05$  and \*\* $p < 0.01$ .

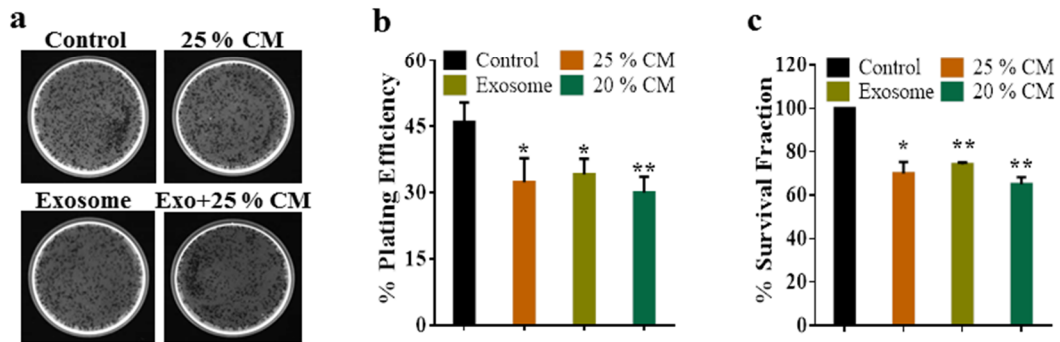

**Supplementary Figure S4. Decreased colony formation of A2780 cells upon treatment with CM, exosomes or both CM and exosomes.** **a**, colony formation under different conditions. **b**, % plating efficiency of A2780 cells reduced in all treated groups. **c**, % cell survival fraction decreased upon treatment with CM, exosomes or both CM and exosomes. The experiments have been repeated at least three times. \* $p < 0.05$  and \*\* $p < 0.01$ .

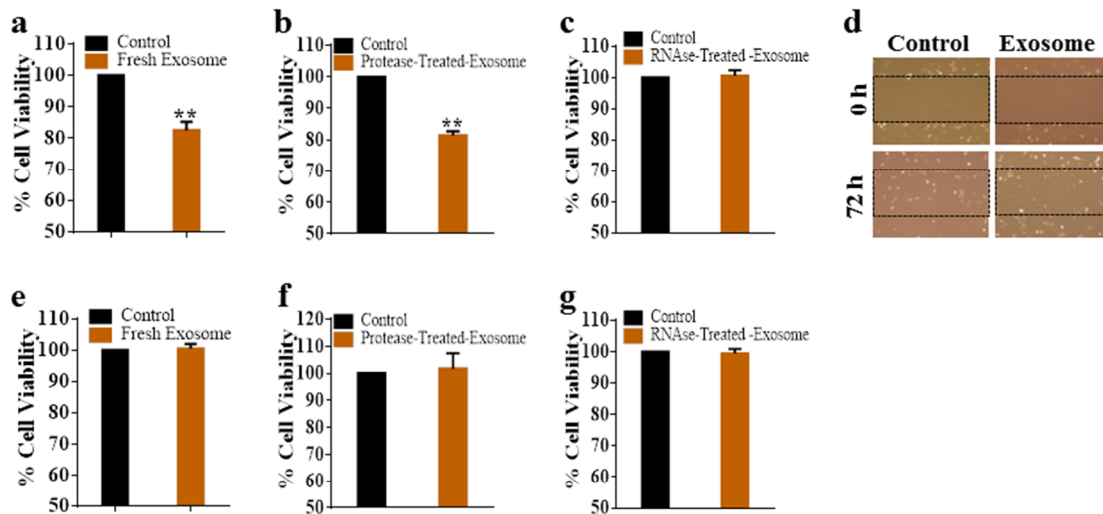

**Supplementary Figure S5. hAMSC-CM-derived exosomes inhibited SKOV-3 cells, but could not inhibit CAOV-3 cells . a-d, internalization of exosomes inhibited the proliferation and wound-healing ability of SKOV-3 ovarian cancer cells. e-g, hAMSC-CM-derived exosomes could not inhibit the proliferation of CAOV-3 ovarian cancer cells. The experiments have been repeated at least three times. \* $p < 0.05$  and \*\* $p < 0.01$ .**

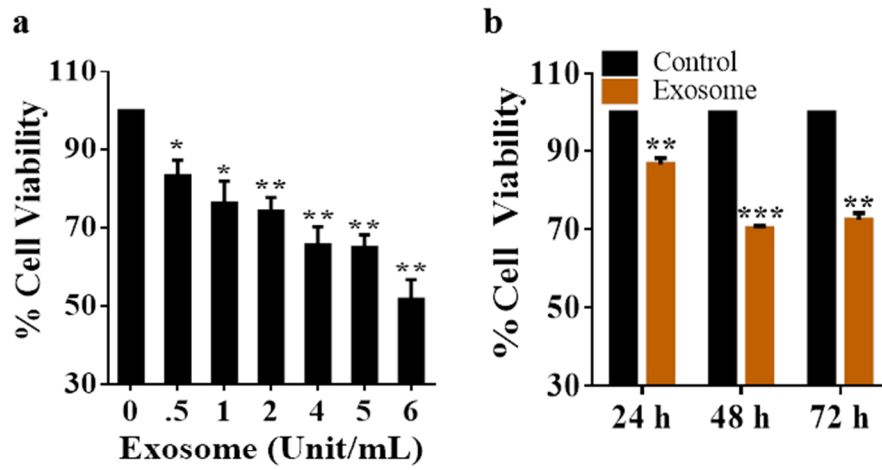

**Supplementary Figure S6. hAMSC-CM-derived exosomes showed dose- and time-dependent inhibitory influence on A2780 ovarian cancer cells. a,** the bar-diagram showing dose-dependent inhibitory influence of hAMSC-CM-derived exosomes on A2780 ovarian cancer cells. **b,** the data showing the time-dependent inhibitory effect of hAMSC-CM-derived exosomes on A2780 ovarian cancer cells. The experiments have been repeated at least three times. \* $p < 0.05$ , \*\* $p < 0.01$  and \*\*\* $p < 0.001$ .

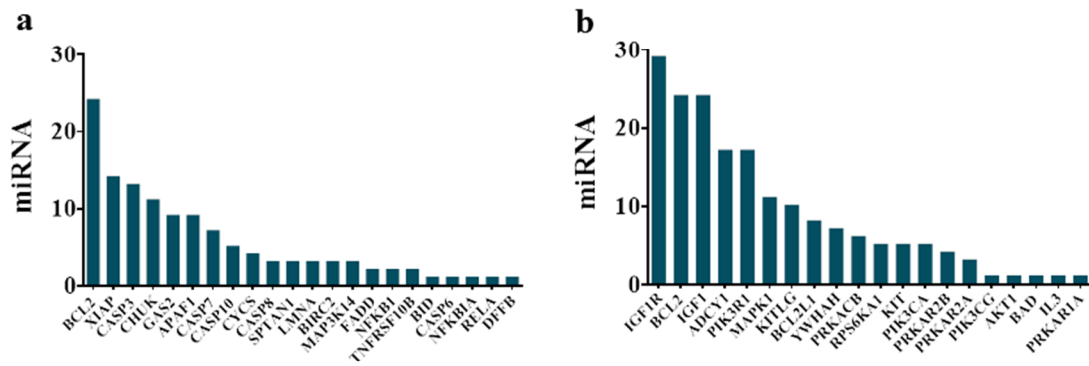

**Supplementary Figure S7. *In silico* analysis of ‘BioCarta signaling pathways’.** **a**, molecules of ‘BioCarta death signaling pathway’ predictably targeted by miRNAs detected in hAMSC-CM-derived exosomes. **b**, molecules belong to ‘BioCarta BAD signaling pathway’, potential targets for hAMSC-CM-derived exosomal miRNAs.

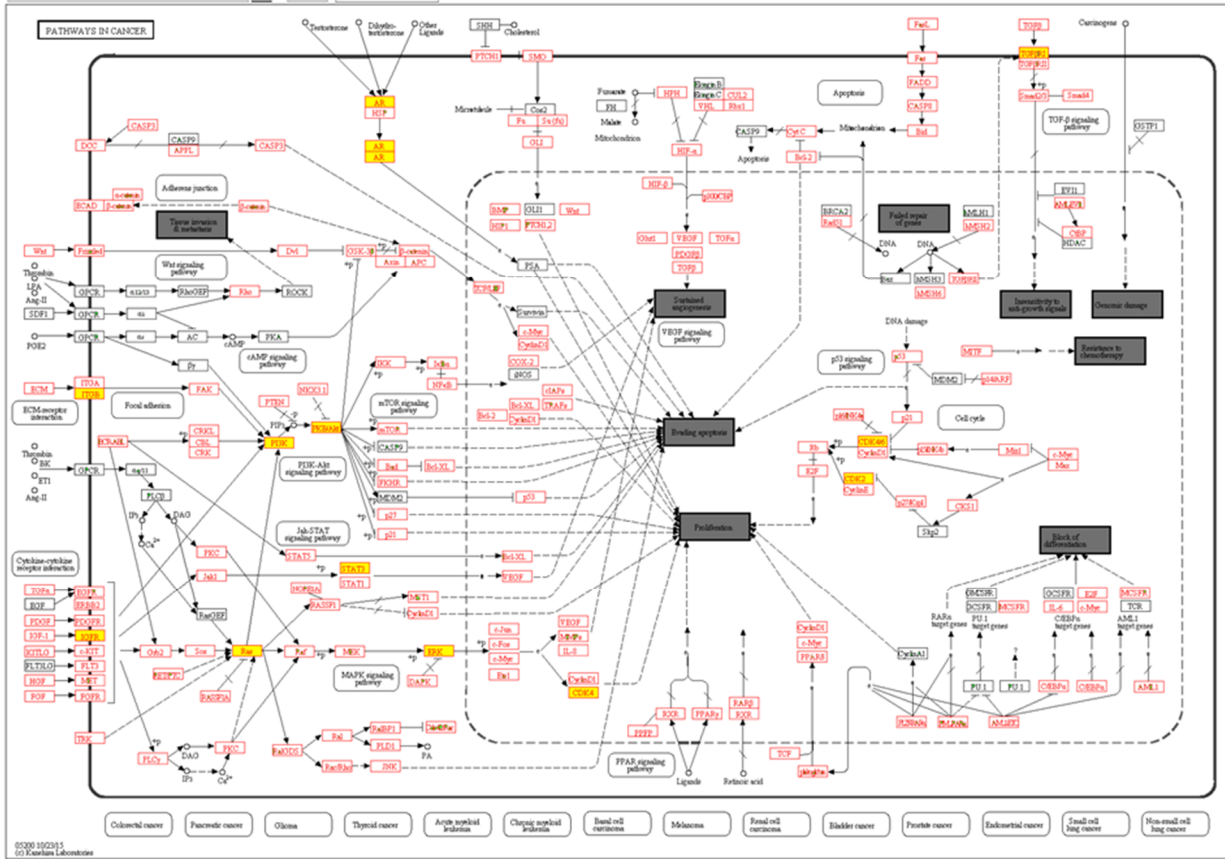

**Supplementary Figure S8. KEGG ‘Pathways in cancer’.** Red colored molecules are predicted targets for 141 miRNAs detected in hAMSC-CM-derived exosomes. Yellow backgrounds represent the molecules, validated as miRNA targets by qRT-PCR. Kanehisa Laboratories (Kyoto University, Japan) kindly provided the KEGG pathway map image “Pathways in cancer (hsa05200)”.

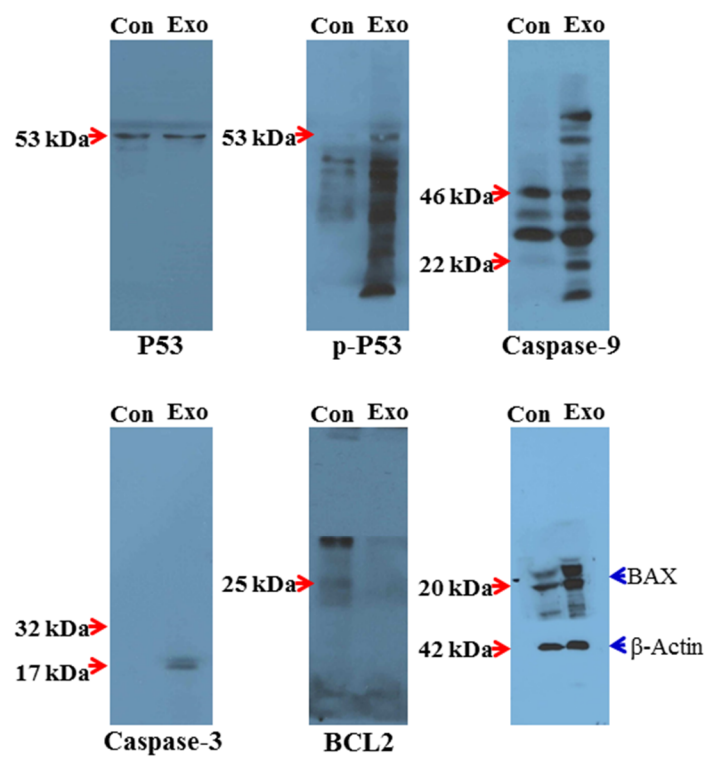

**Supplementary Figure S9. Full length gel images of Figure-6a.** The figure is showing the full length gel images of western-blot data presented in Figure-6a. The images are representative of three independent experiments.
